# Supplementary material
Source: publisher site journal article supplement (https://www.spandidos-publications.com/4356/downloadSupplementary)

Figure S1. Dose-response curves (using GraphPad Prism) determined from Trypan blue exclusion assay of the SNB-19, U87MG, T98G and MDA-MB-231 cells. Data points were fitted using GraphPad Prism 9 software for the determination of the  $EC_{50}$  values.

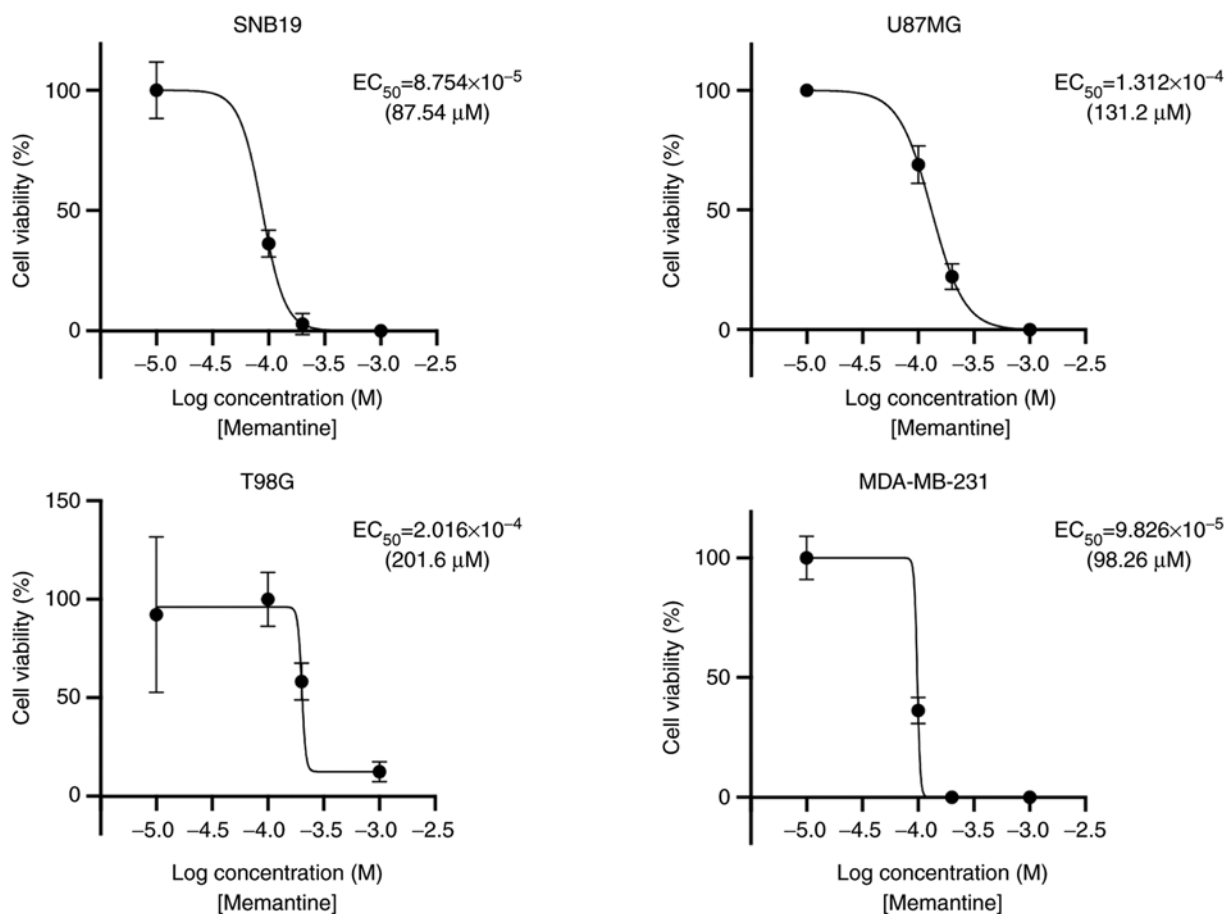

Supplement: Supplementary file 1 [file downloadSupplementary]
